# Supplementary material
Source: PubMed Central journal article supplement (PMC2516955)
Supplement: 2008.951392_1.pdf [file 2008.951392_1.pdf]

**Supplemental Table 1.** Primary Antibodies Used in the Study

| Antibody         | Specificity                   | Used for detecting:              | Species | Dilution | Source                                 |
|------------------|-------------------------------|----------------------------------|---------|----------|----------------------------------------|
| Anti-neuroglobin | Human recombinant neuroglobin | Ngb                              | mouse   | 1:100    | BioVendor Laboratory Medicine, Inc.    |
| Anti-neuroglobin | Human recombinant neuroglobin | Ngb                              | rabbit  | 1:100    | M. Hargrove, Iowa State University, IA |
| Anti-cytoglobin  | Human recombinant cytoglobin  | Cygb                             | rabbit  | 1:100    | M. Hargrove, Iowa State University, IA |
| Anti-Vimentin    | Vimentin                      | Iris fibroblasts and melanocytes | mouse   | 1:200    | DakoCytomation, Carpinteria, CA        |
