# Supplementary material
Source: PubMed Central journal article supplement (PMC2516955)
Supplement: 2008.951392_2.pdf [file 2008.951392_2.pdf]

**Supplemental Table 2.** Summary of the distribution of Ngb and Cygb in the human and canine anterior eye segment

|                                          | Ngb | Cygb |
|------------------------------------------|-----|------|
| Ciliary pigmented epithelium             | -   | -    |
| Ciliary nonpigmented epithelium          | +   | +    |
| Ciliary muscle                           | +   | +    |
| Iridal anterior border layer fibroblasts | +   | +    |
| Iridal anterior border layer melanocytes | +   | +    |
| Iridal stromal fibroblasts               | +   | +    |
| Iris stromal melanocytes                 | +   | +    |
| Iridal sphincter muscle                  | +   | +    |
| Iridal dilator muscle                    | +   | +    |
| Iridal posterior epithelium              | -   | -    |
| Trabecular meshwork                      | +   | +    |
| Corneal epithelium                       | +   | +    |
| Corneal stromal keratocytes              | +   | +    |
| Corneal endothelium                      | +   | +    |
| Lens capsule                             | -   | -    |
| Lens anterior epithelium                 | +   | +    |
| Lens fibers                              | -   | -    |
